# Supplementary material for: Polymethylene with cage silsesquioxane: densely grafted structure prevents side-chain crystallization
Source: Royal Society of Chemistry journal article supplement (doi:10.1039/d4py01222d), 2025-01-01
Supplement: d4py01222d1.pdf [file d4py01222d1.pdf]

## Supporting Information

### Contents:

1. NMR spectra
2. MALDI-TOFMS
3. SEC charts
4. FT-IR spectra
5. Thermal properties
6. Film appearance

## 1. NMR spectra

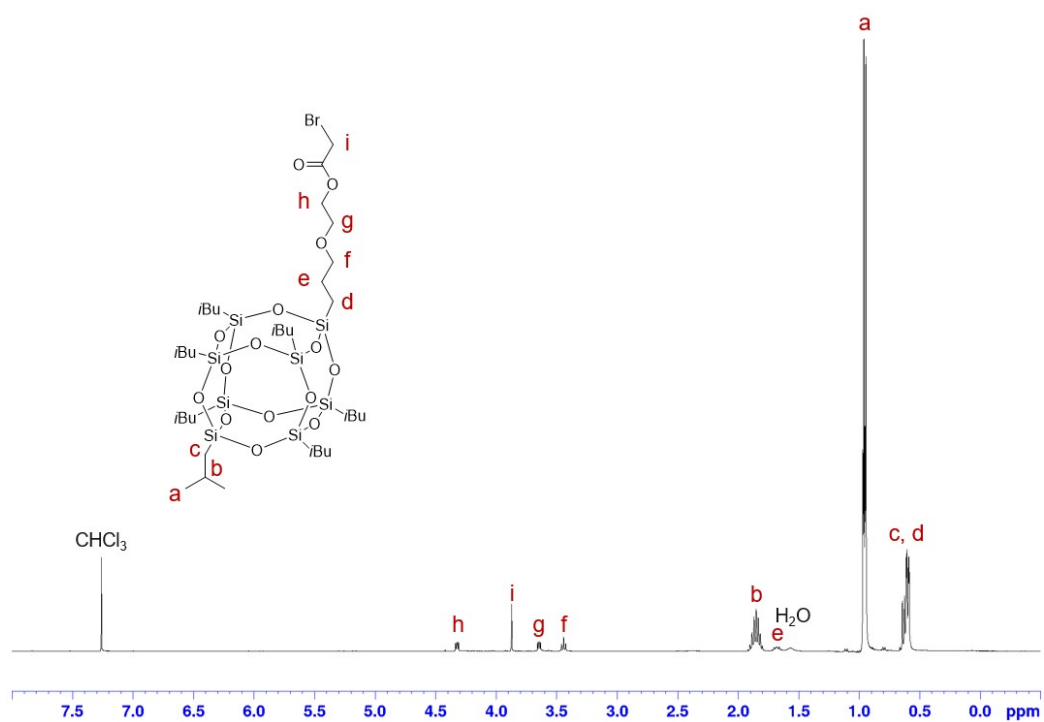

**Figure S1.**  $^1\text{H-NMR}$  spectrum (400 MHz) of **2** in  $\text{CDCl}_3$ .

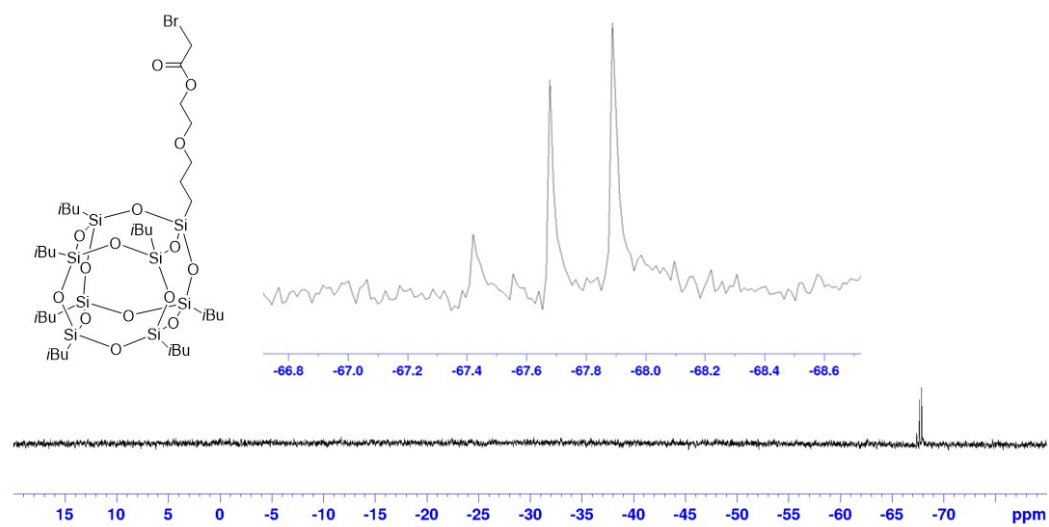

**Figure S2.**  $^{29}\text{Si}$ -NMR spectrum (80 MHz, inverse-gated decoupling) of **2** in  $\text{CDCl}_3$ .

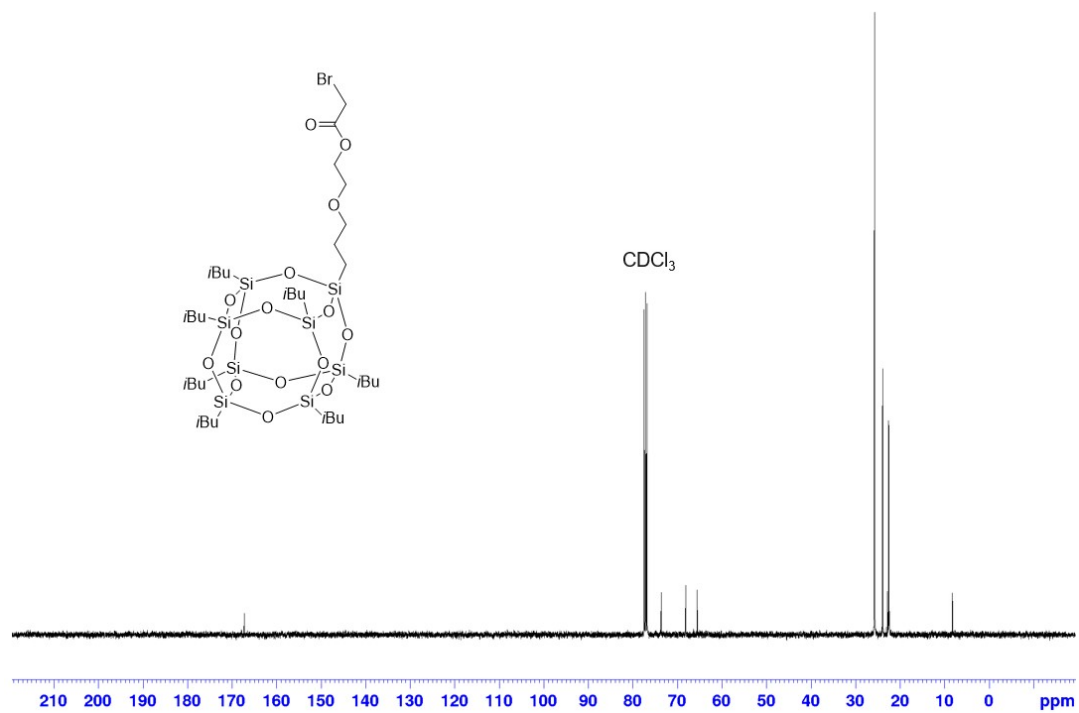

**Figure S3.**  $^{13}\text{C}$ -NMR spectrum (100 MHz) of **2** in  $\text{CDCl}_3$ .

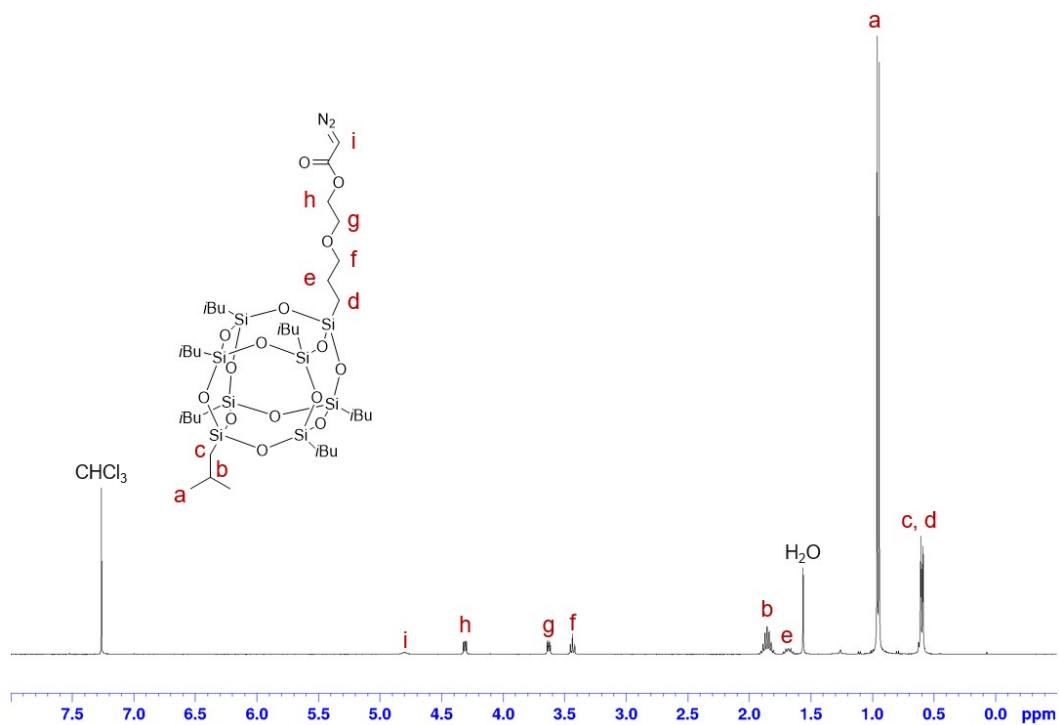

**Figure S4.**  $^1\text{H-NMR}$  spectrum (400 MHz) of **3** in  $\text{CDCl}_3$ .

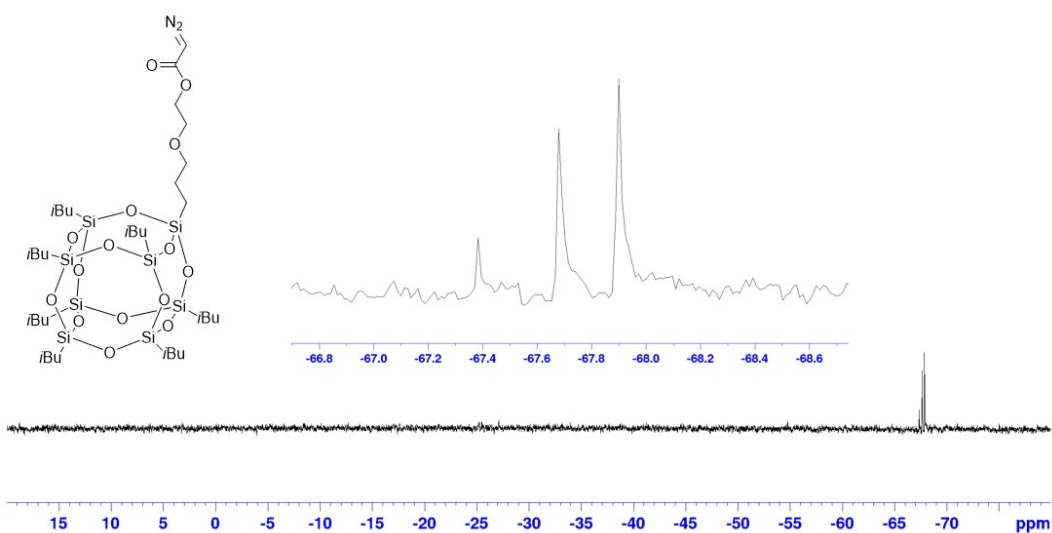

**Figure S5.**  $^{29}\text{Si-NMR}$  spectrum (80 MHz, inverse-gated decoupling) of **3** in  $\text{CDCl}_3$ .

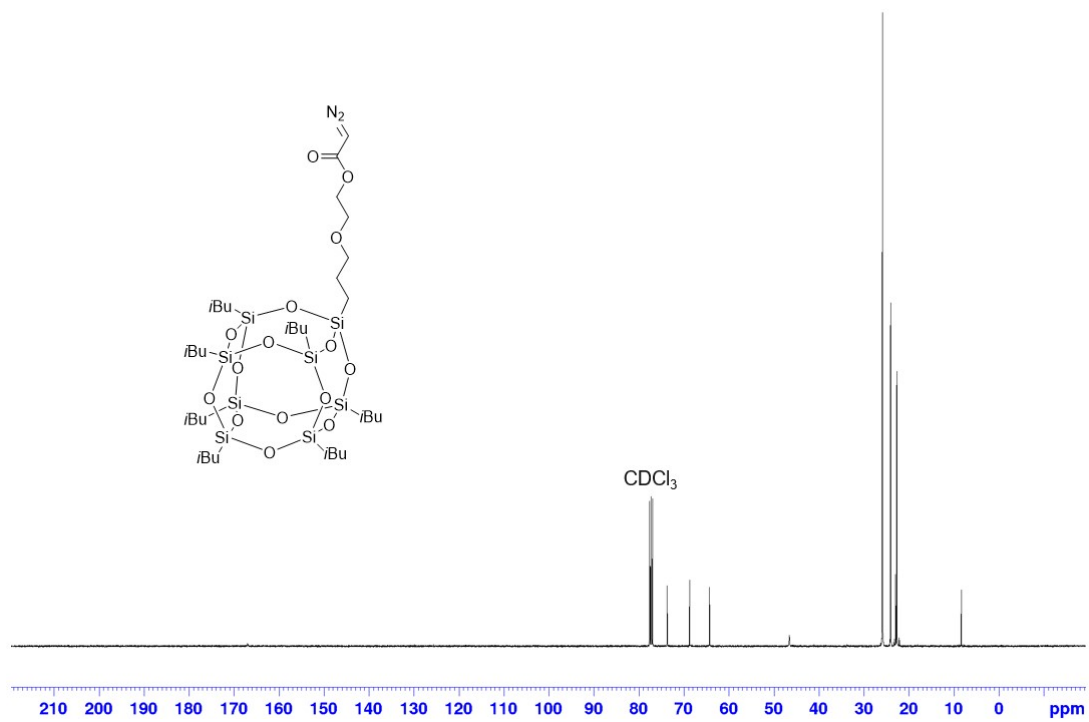

**Figure S6.**  $^{13}\text{C}$ -NMR spectrum (100 MHz) of **3** in  $\text{CDCl}_3$ .

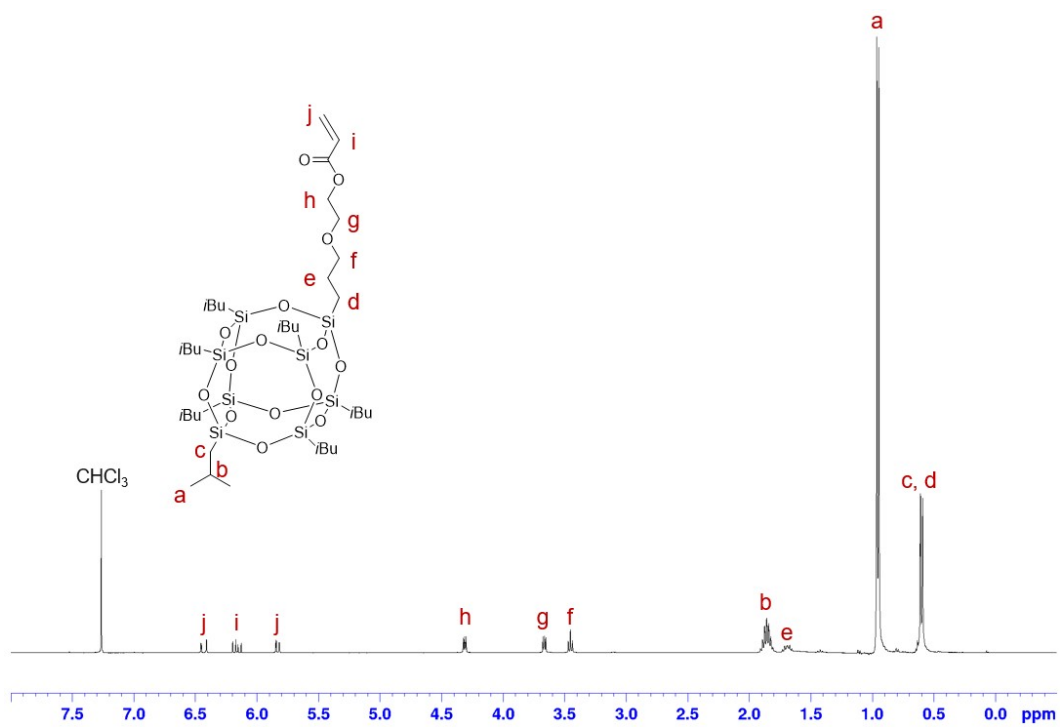

**Figure S7.**  $^1\text{H}$ -NMR spectrum (400 MHz) of **4** in  $\text{CDCl}_3$ .

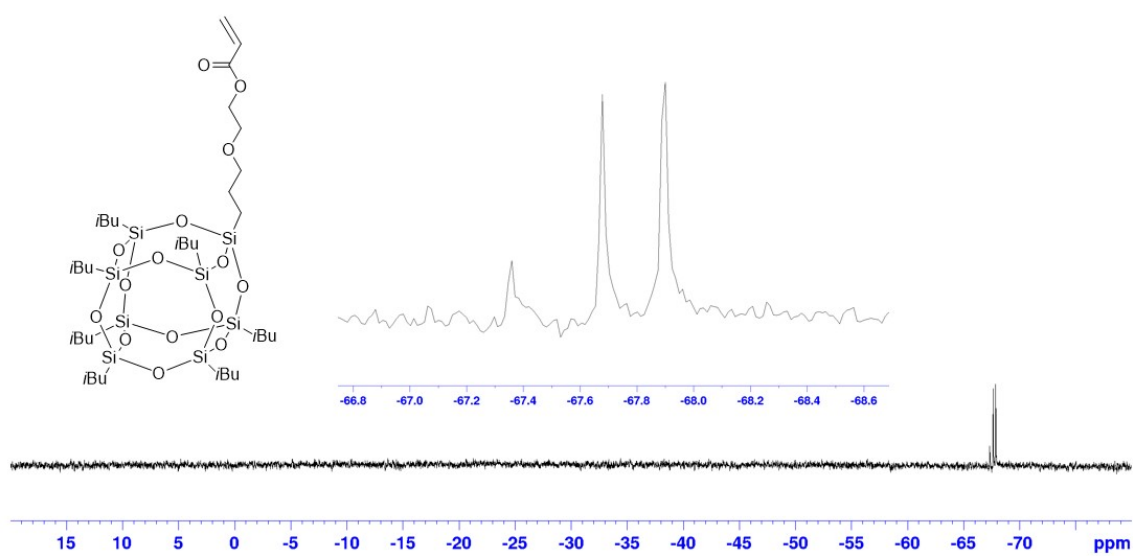

**Figure S8.**  $^{29}\text{Si}$ -NMR spectrum (80 MHz, inverse-gated decoupling) of **4** in  $\text{CDCl}_3$ .

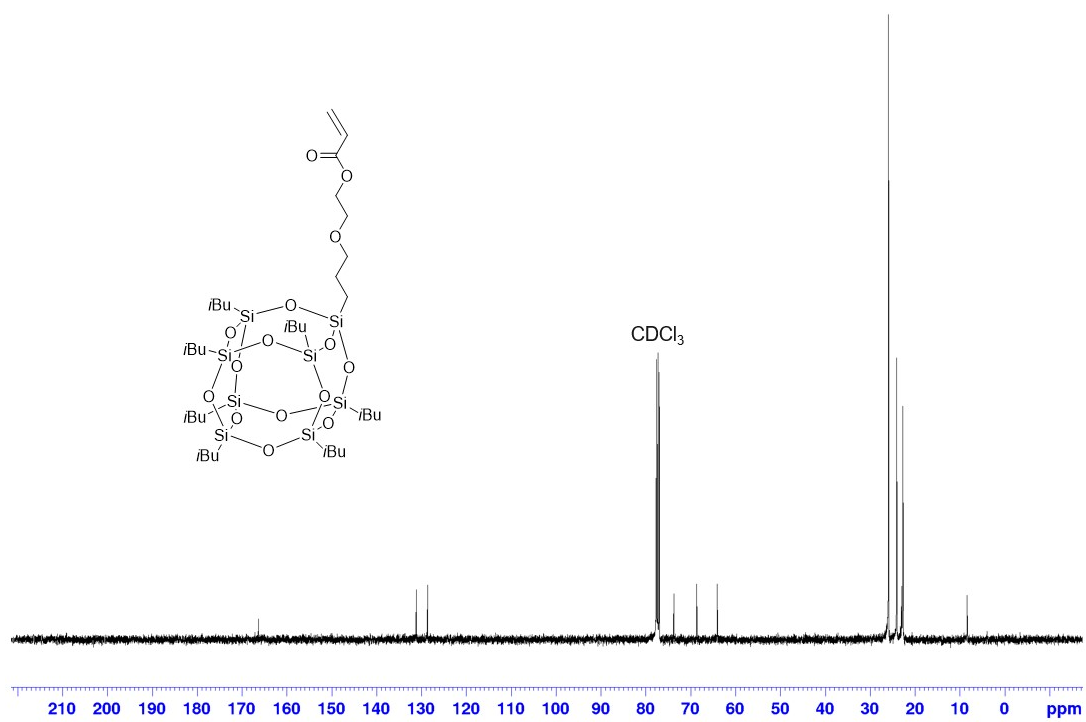

**Figure S9.**  $^{13}\text{C}$ -NMR spectrum (100 MHz) of **4** in  $\text{CDCl}_3$ .

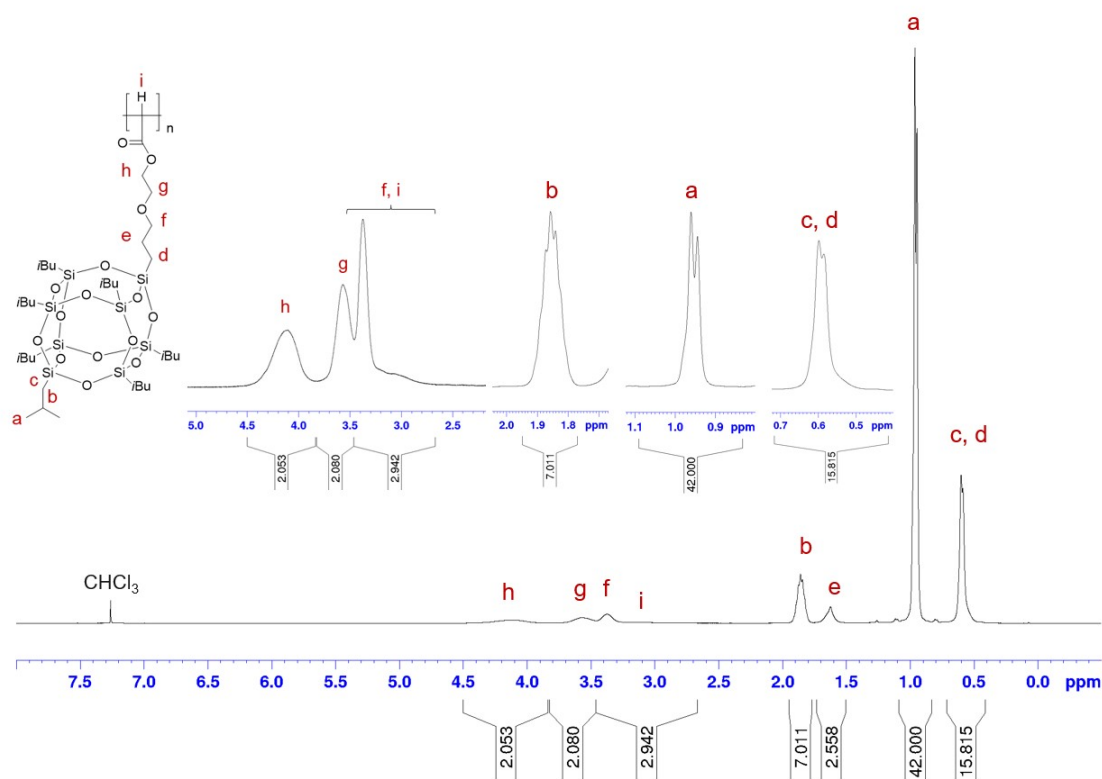

**Figure S10.**  $^1\text{H}$ -NMR spectrum (400 MHz) of **P1** in  $\text{CDCl}_3$ .

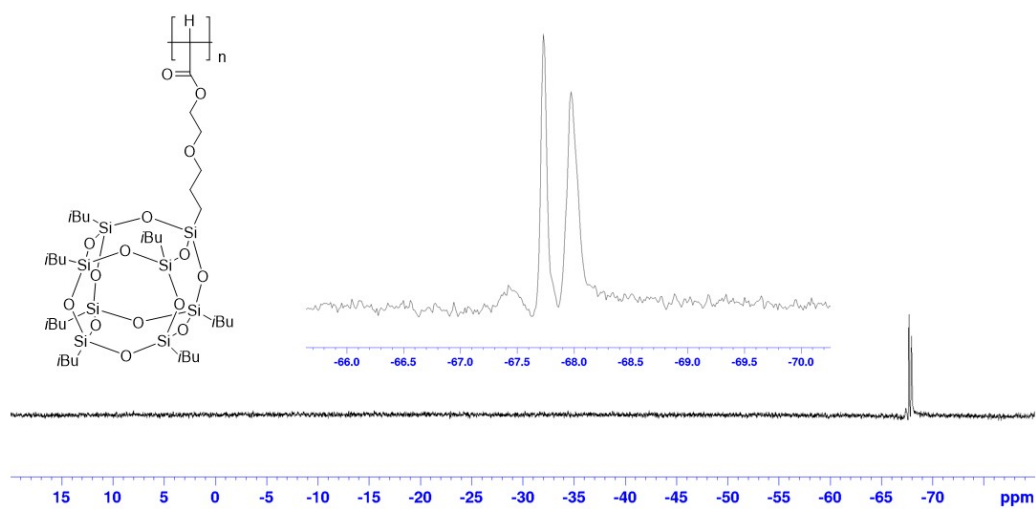

**Figure S11.**  $^{29}\text{Si}$ -NMR spectrum (80 MHz, inverse-gated decoupling, NS=87) of **P1** in  $\text{CDCl}_3$ .

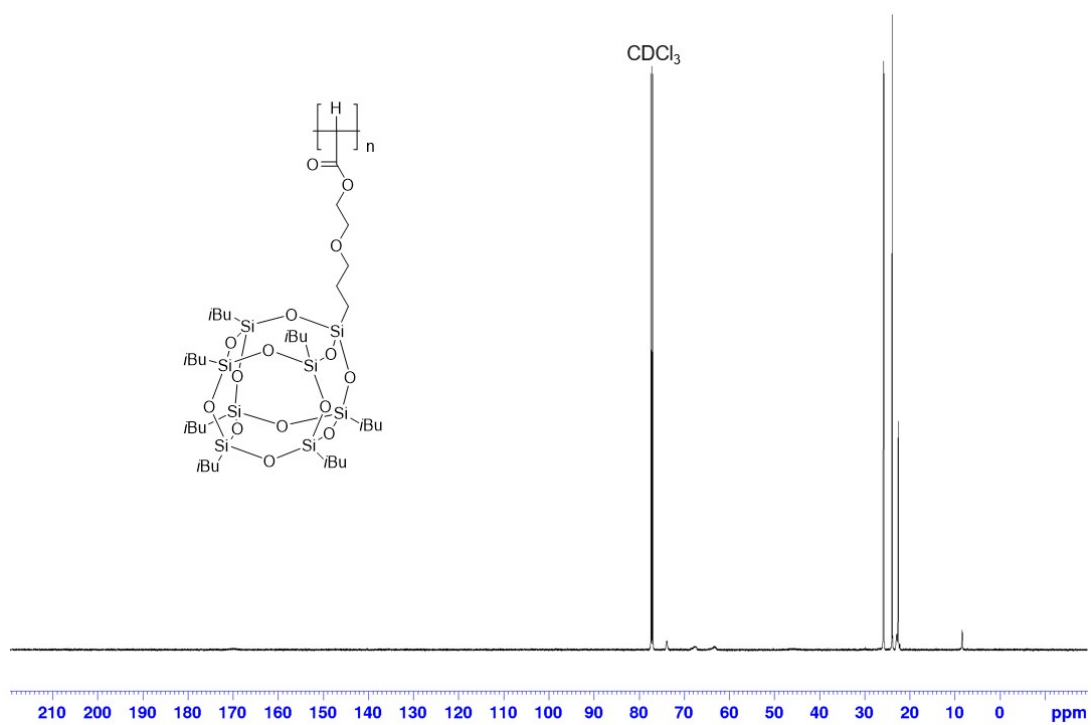

**Figure S12.**  $^{13}\text{C}$ -NMR spectrum (100 MHz) of **P1** in  $\text{CDCl}_3$ .



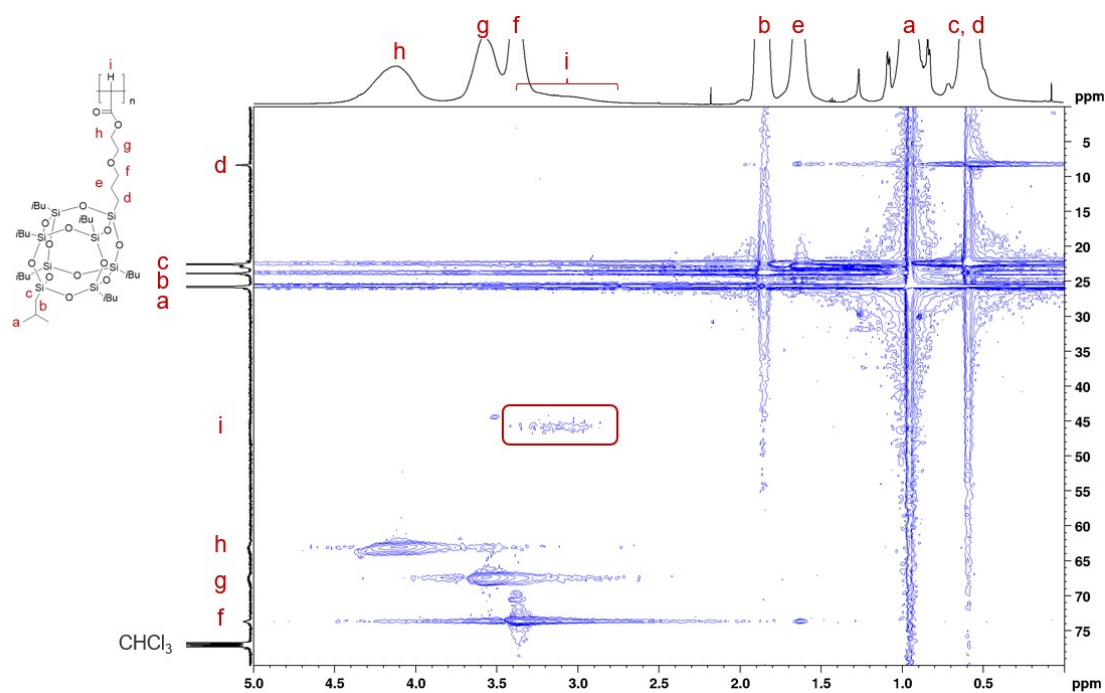

Figure S13.  $^1\text{H}$ - $^{13}\text{C}$  HSQC NMR spectrum of **P1** in  $\text{CDCl}_3$ , 500 MHz for  $^1\text{H}$ .

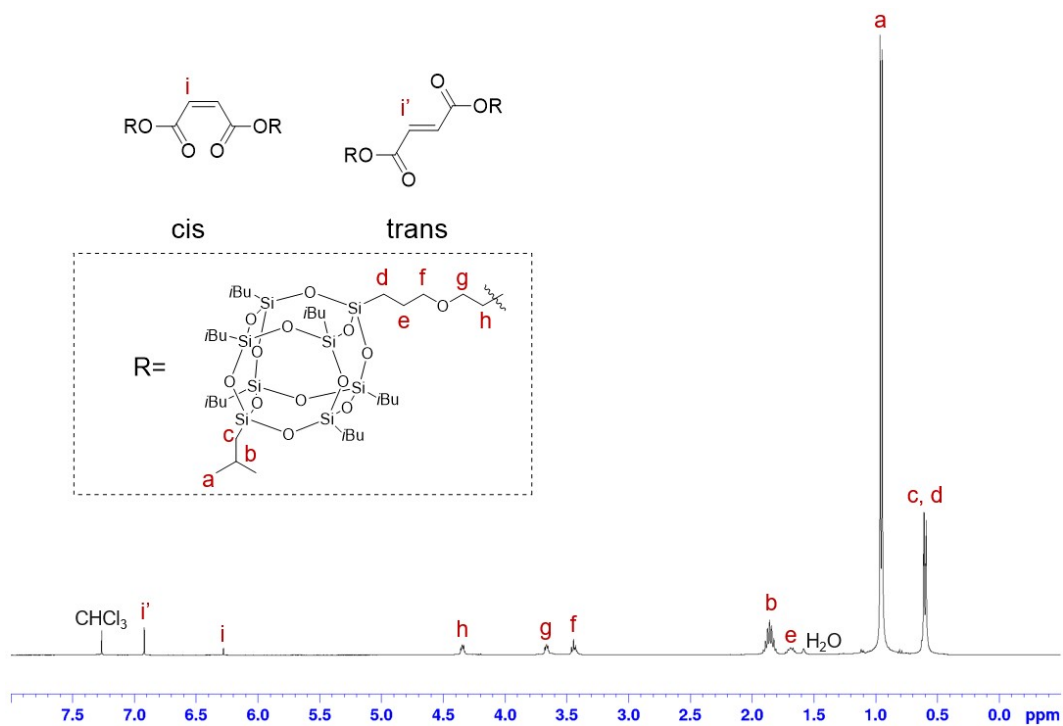

Figure S14.  $^1\text{H}$ -NMR spectrum (400 MHz) of **D1** in  $\text{CDCl}_3$ .

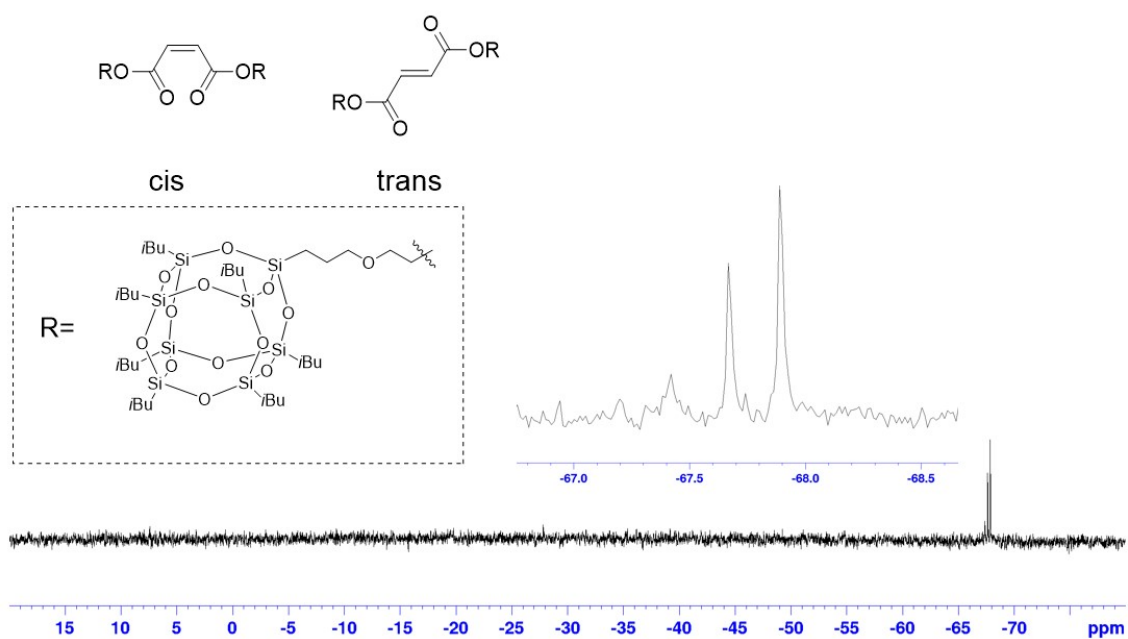

**Figure S15.**  $^{29}\text{Si}$ -NMR spectrum (80 MHz, inverse-gated decoupling) of **D1** in  $\text{CDCl}_3$ .

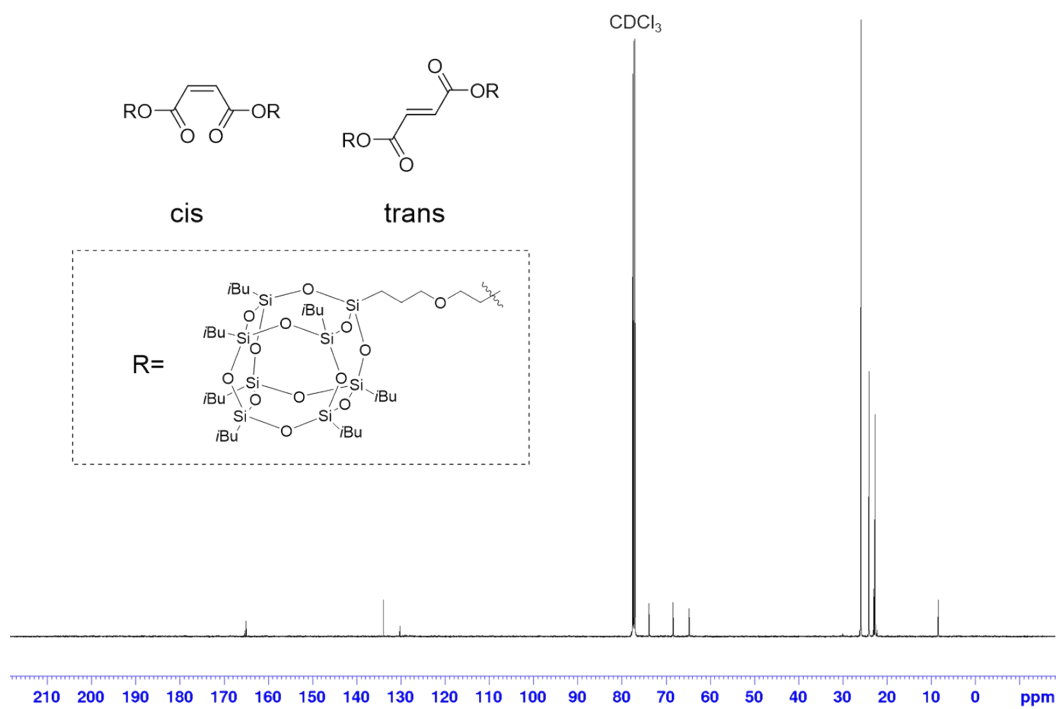

**Figure S16.**  $^{13}\text{C}$ -NMR spectrum (125 MHz) of **D1** in  $\text{CDCl}_3$ .

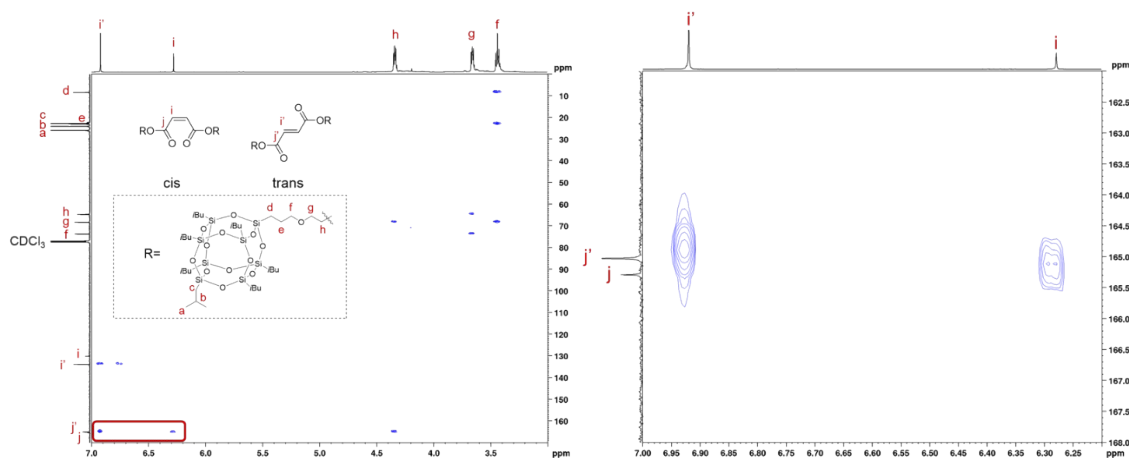

**Figure S17.**  $^1\text{H}$ - $^{13}\text{C}$  HMBC NMR spectra of **D1** in  $\text{CDCl}_3$ , 500 MHz for  $^1\text{H}$  (left: full spectrum and right: expanded view).

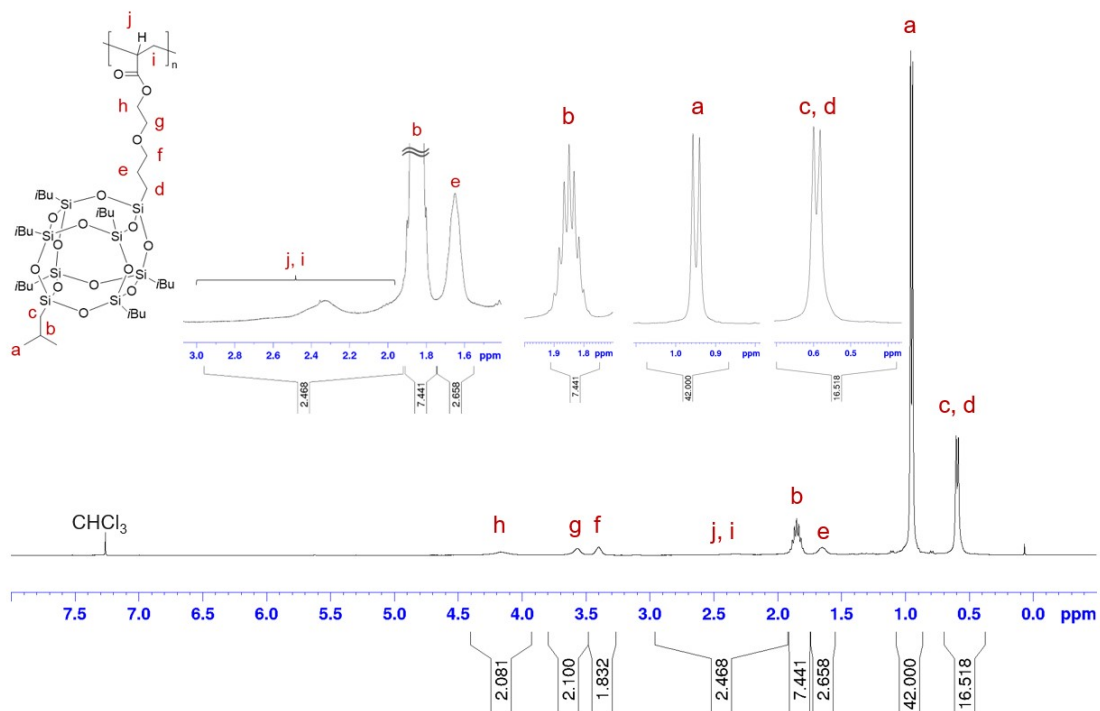

**Figure S18.**  $^1\text{H}$ -NMR spectrum (400 MHz) of **P2** in  $\text{CDCl}_3$ .

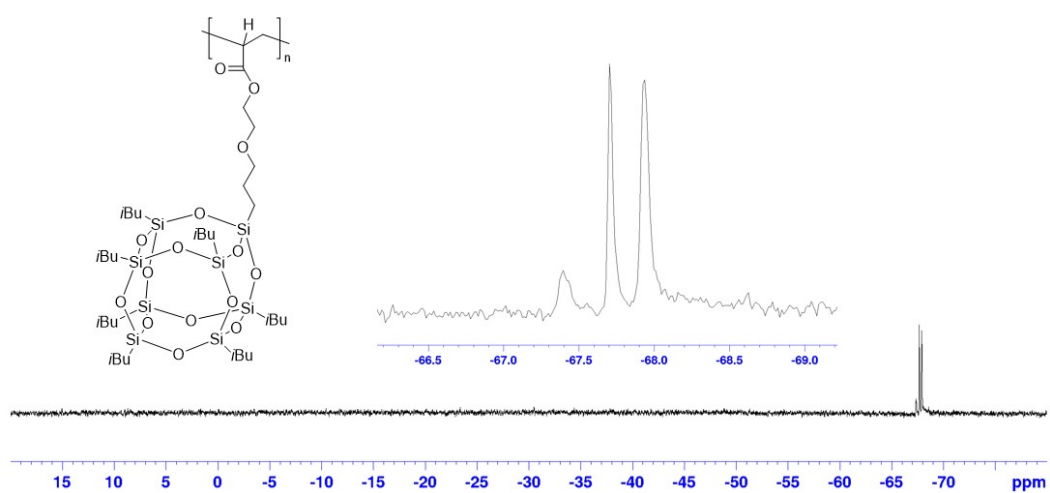

**Figure S19.**  $^{29}\text{Si}$ -NMR spectrum (80 MHz, inverse-gated decoupling, NS=128) of **P2** in  $\text{CDCl}_3$ .

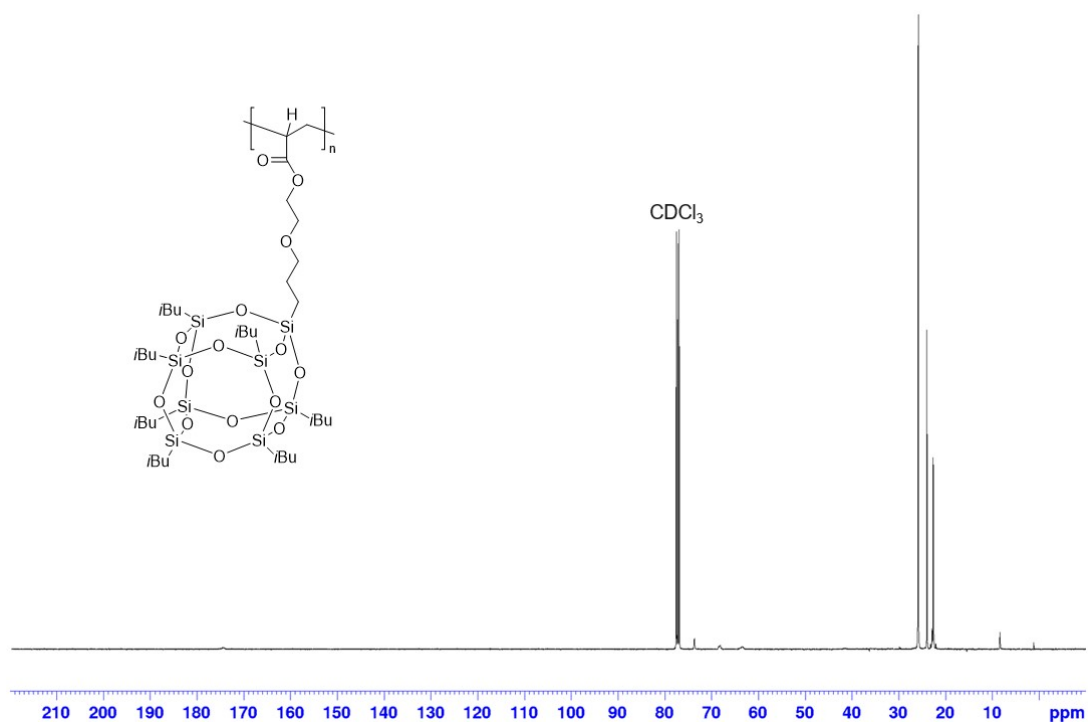

**Figure S20.**  $^{13}\text{C}$ -NMR spectrum (100 MHz) of **P2** in  $\text{CDCl}_3$ .

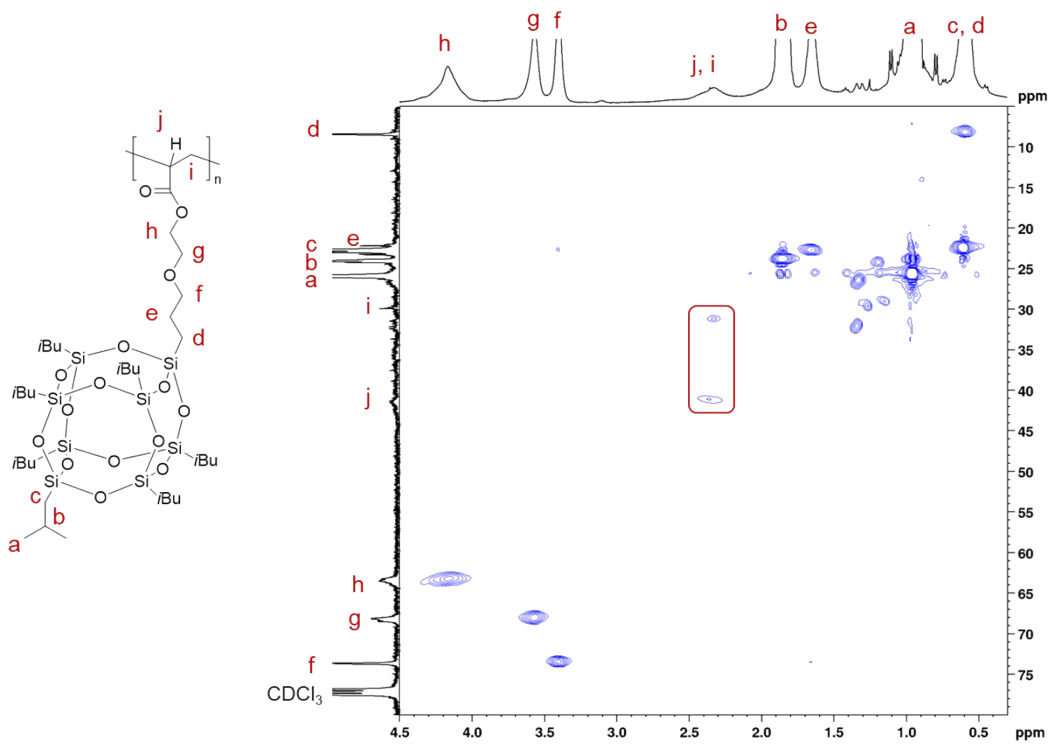

**Figure S21.**  $^1\text{H}$ - $^{13}\text{C}$  HSQC NMR spectrum of **P2** in  $\text{CDCl}_3$ , 500 MHz for  $^1\text{H}$ .

## 2. MALDI-TOFMS

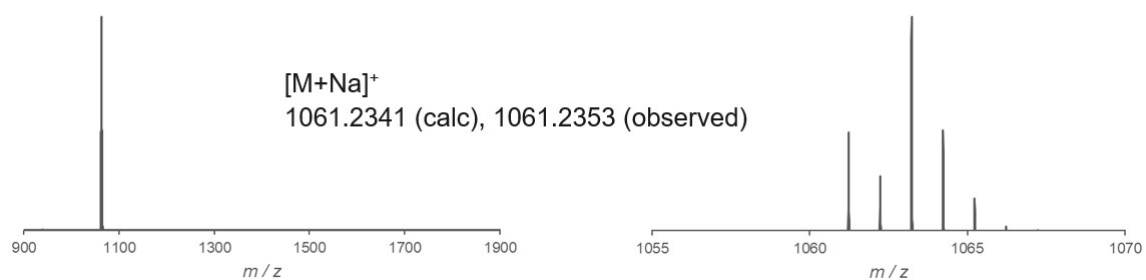

**Figure S22.** MALDI-TOF-MS spectra of **2** (left: full spectrum and right: expanded view).

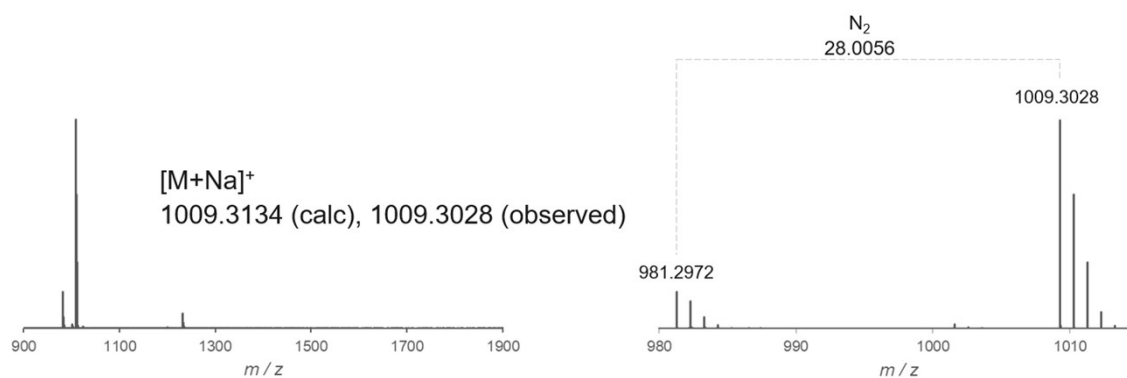

**Figure S23.** MALDI-TOF-MS spectra of **3** (left: full spectrum and right: expanded view).

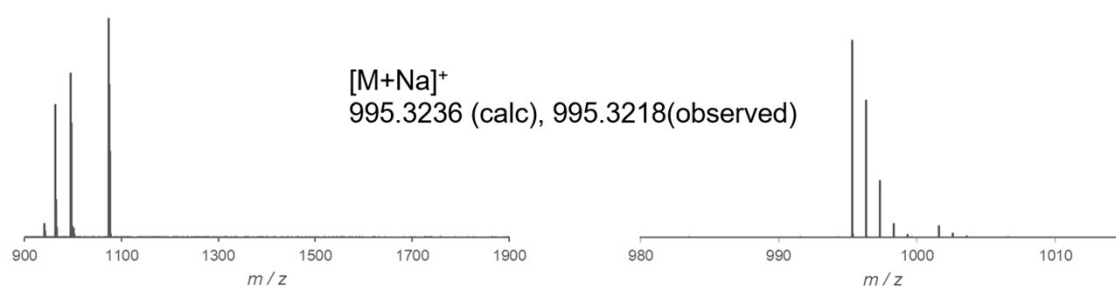

**Figure S24.** MALDI-TOF-MS spectra of **4** (left: full spectrum and right: expanded view).

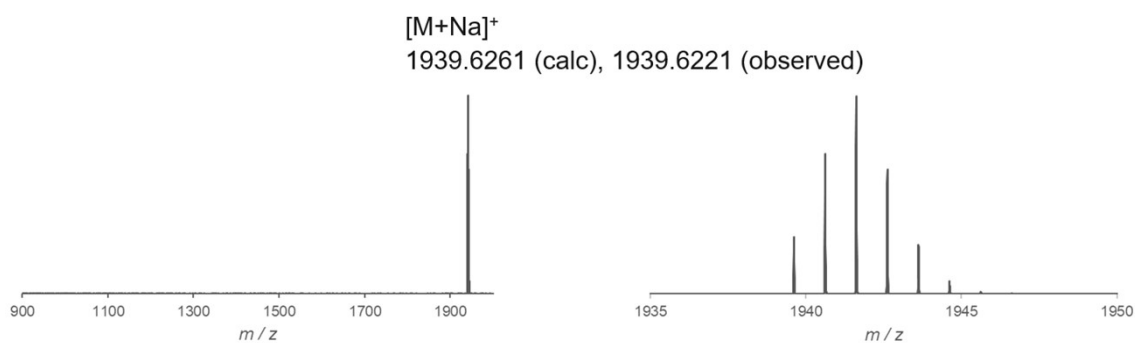

**Figure S25.** MALDI-TOF-MS spectra of **D1** (left: full spectrum and right: expanded view).

### 3. SEC charts

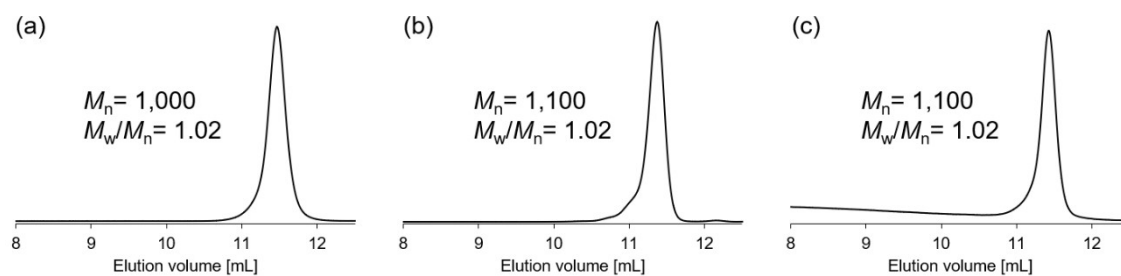

**Figure S26.** SEC charts of (a) **2**, (b) **3**, and (c) **4** (1.0 mL/min in THF, RI detector).

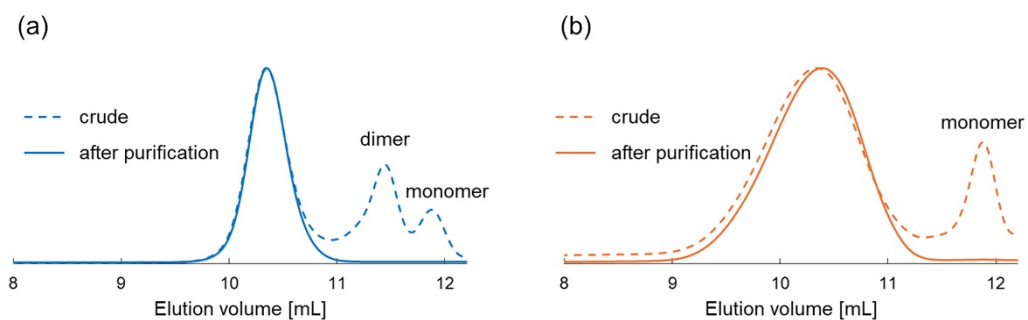

**Figure S27.** SEC charts (1.0 mL/min in THF, RI detector) of (a) **P1** and (b) **P2** before and after purification with preparative HPLC.





#### 4. FT-IR spectra

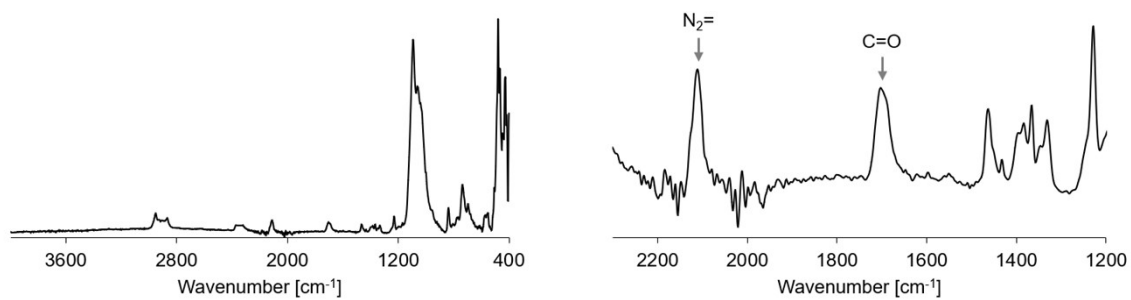

**Figure S28.** FT-IR spectra of **3** (left: full spectrum and right: expanded view).

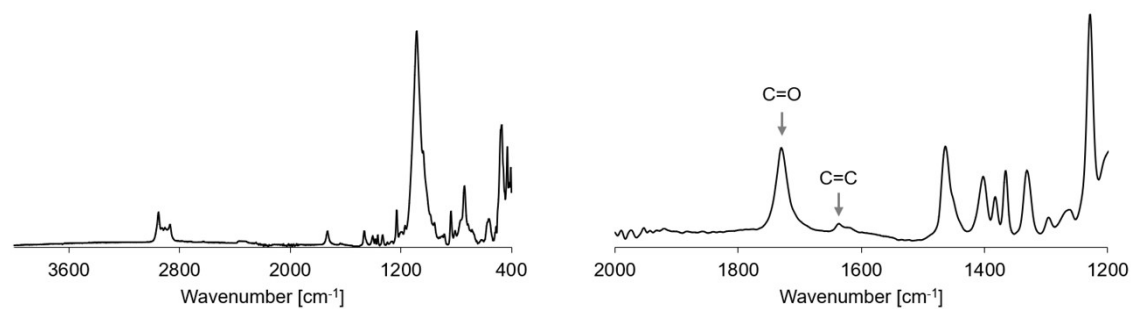

**Figure S29.** FT-IR spectra of **4** (left: full spectrum and right: expanded view).

## 5. Thermal properties

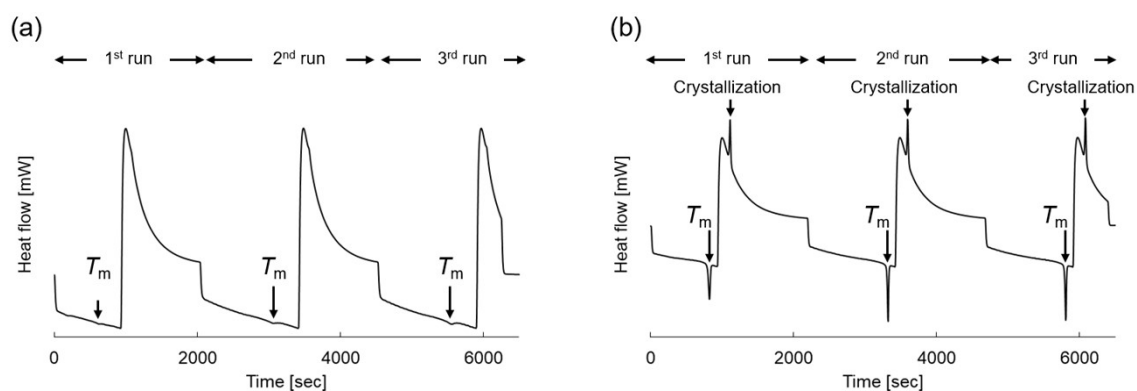

Figure S30. DSC curves of (a) P1 and (b) P2 (under N<sub>2</sub>, 10 °C/min).

## 6. Film appearance

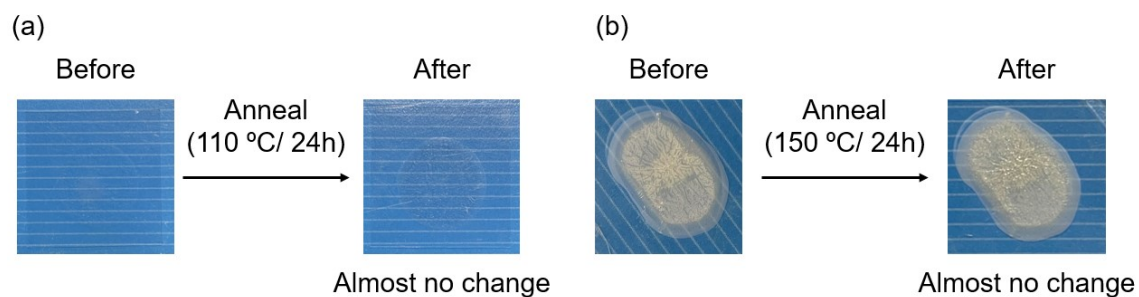

Figure S31. Photographs before and after annealing of (a) P1 and (b) P2.
